# Supplementary material for: Decoration of A-Ring of a Lupane-Type Triterpenoid with Different Oxygen and Nitrogen Heterocycles
Source: MDPI journal article supplement (doi:10.3390/molecules27154904), 2022-07-31
Supplement: s1 [file s1]

# Decoration of A-ring of a lupane-type triterpenoid with different oxygen and nitrogen heterocycles

Joana L. C. Sousa <sup>1,\*†</sup>, H lio M. T. Albuquerque <sup>1,†</sup>, Armando J. D. Silvestre <sup>2</sup> and Artur M. S. Silva <sup>1,\*</sup>

<sup>1</sup> LAQV-REQUIMTE, Department of Chemistry, University of Aveiro, 3810-193 Aveiro, Portugal; helio.albuquerque@ua.pt (H.M.T.A.)

<sup>2</sup> CICECO – Aveiro Institute of Materials, Department of Chemistry, University of Aveiro, 3810-193 Aveiro, Portugal; armsil@ua.pt (A.J.D.S.)

\* Correspondence: joanasousa@ua.pt (J.L.C.S.); artur.silva@ua.pt (A.M.S.S.); Tel.: +351-234-370-714 (A.M.S.S.)

† J.L.C.S. and H.M.T.A. contributed equally to this work.

---

## Contents

|                                                                                                                                                                                                                                                                                     |    |
|-------------------------------------------------------------------------------------------------------------------------------------------------------------------------------------------------------------------------------------------------------------------------------------|----|
| <b>Figure S1.</b> <sup>1</sup> H NMR spectrum of methyl ( <i>E</i> )-2-(4-fluorobenzylidene)betulonate ( <b>3c</b> ) (300.13 MHz, CDCl <sub>3</sub> ). .....                                                                                                                        | 3  |
| <b>Figure S2.</b> <sup>13</sup> C NMR spectrum of methyl ( <i>E</i> )-2-(4-fluorobenzylidene)betulonate ( <b>3c</b> ) (75.47 MHz, CDCl <sub>3</sub> ).....                                                                                                                          | 3  |
| <b>Figure S3.</b> <sup>1</sup> H NMR spectrum of methyl 2-(1-phenyl-2-nitroethyl)betulonate ( <b>4a</b> ) (500.13 MHz, CDCl <sub>3</sub> ).....                                                                                                                                     | 4  |
| <b>Figure S4.</b> <sup>13</sup> C NMR spectrum of methyl 2-(1-phenyl-2-nitroethyl)betulonate ( <b>4a</b> ) (125.77 MHz, CDCl <sub>3</sub> ).....                                                                                                                                    | 4  |
| <b>Figure S5.</b> <sup>1</sup> H NMR spectrum of methyl 2-[1-(4-methoxyphenyl)-2-nitroethyl]betulonate ( <b>4b</b> ) (500.13 MHz, CDCl <sub>3</sub> ). .....                                                                                                                        | 5  |
| <b>Figure S6.</b> <sup>13</sup> C NMR spectrum of methyl 2-[1-(4-methoxyphenyl)-2-nitroethyl]betulonate ( <b>4b</b> ) (125.77 MHz, CDCl <sub>3</sub> ). .....                                                                                                                       | 5  |
| <b>Figure S7.</b> NOESY spectrum of the methyl 2-[1-(4-methoxyphenyl)-2-nitroethyl]betulonate ( <b>4b</b> ) (500.13 MHz, CDCl <sub>3</sub> ). .....                                                                                                                                 | 6  |
| <b>Figure S8.</b> <sup>1</sup> H NMR spectrum of methyl 2-[1-(4-fluorophenyl)-2-nitroethyl]betulonate ( <b>4c</b> ) (300.13 MHz, CDCl <sub>3</sub> ). .....                                                                                                                         | 7  |
| <b>Figure S9.</b> <sup>13</sup> C NMR spectrum of methyl 2-[1-(4-fluorophenyl)-2-nitroethyl]betulonate ( <b>4c</b> ) (75.47 MHz, CDCl <sub>3</sub> ). .....                                                                                                                         | 7  |
| <b>Figure S10.</b> <sup>1</sup> H NMR spectrum of the 4-phenyl-1,2-oxazine-fused BoOMe compound <b>5a</b> (300.13 MHz, CDCl <sub>3</sub> ). .....                                                                                                                                   | 8  |
| <b>Figure S11.</b> <sup>13</sup> C NMR spectrum of the 4-phenyl-1,2-oxazine-fused BoOMe compound <b>5a</b> (75.47 MHz, CDCl <sub>3</sub> ). .....                                                                                                                                   | 8  |
| <b>Figure S12.</b> <sup>1</sup> H NMR spectrum of the 4-(4-methoxyphenyl)-1,2-oxazine-fused BoOMe compound <b>5b</b> (300.13 MHz, CDCl <sub>3</sub> ).....                                                                                                                          | 9  |
| <b>Figure S13.</b> <sup>13</sup> C NMR spectrum of the 4-(4-methoxyphenyl)-1,2-oxazine-fused BoOMe compound <b>5b</b> (75.47 MHz, CDCl <sub>3</sub> ).....                                                                                                                          | 9  |
| <b>Figure S14.</b> ATR-FTIR spectrum of the 4-(4-methoxyphenyl)-1,2-oxazine-fused BoOMe compound <b>5b</b> (FTIR Bruker Tensor 27, with ATR Golden Gate accessory, Diamond (Specac), Absorbance mode, resolution 4 cm <sup>-1</sup> , 256 scans, 4000-500 cm <sup>-1</sup> ). ..... | 10 |

|                                                                                                                                                                                |    |
|--------------------------------------------------------------------------------------------------------------------------------------------------------------------------------|----|
| <b>Figure S15.</b> $^1\text{H}$ NMR spectrum of the 4-(4-fluorophenyl)-1,2-oxazine-fused BoOMe compound <b>5c</b> (300.13 MHz, $\text{CDCl}_3$ ). .....                        | 11 |
| <b>Figure S16.</b> $^{13}\text{C}$ NMR spectrum of the 4-(4-fluorophenyl)-1,2-oxazine-fused BoOMe compound <b>5c</b> (75.47 MHz, $\text{CDCl}_3$ ). .....                      | 11 |
| <b>Figure S17.</b> NOESY spectrum of the 4-(4-fluorophenyl)-1,2-oxazine-fused BoOMe compound <b>5c</b> (300.13 MHz, $\text{CDCl}_3$ ). .....                                   | 12 |
| <b>Figure S18.</b> $^1\text{H}$ NMR spectrum of the pyran-fused BoOMe compound <b>6</b> (300.13 MHz, $\text{CDCl}_3$ )..                                                       | 13 |
| <b>Figure S19.</b> $^{13}\text{C}$ NMR spectrum of the pyran-fused BoOMe compound <b>6</b> (75.47 MHz, $\text{CDCl}_3$ )...                                                    | 13 |
| <b>Figure S20.</b> $^1\text{H}$ NMR spectrum of the diarylpyridine-fused BoOMe compound <b>8</b> (500.13 MHz, $\text{CDCl}_3$ ).....                                           | 14 |
| <b>Figure S21.</b> $^{13}\text{C}$ NMR spectrum of the diarylpyridine-fused BoOMe compound <b>8</b> (125.77 MHz, $\text{CDCl}_3$ ).....                                        | 14 |
| <b>Figure S22.</b> $^1\text{H}$ NMR spectrum of methyl ( <i>E</i> )-2-[3-(4-methoxyphenyl)prop-2-yn-1-ylidene]betulonate ( <b>10</b> ) (300.13 MHz, $\text{CDCl}_3$ ). .....   | 15 |
| <b>Figure S23.</b> $^{13}\text{C}$ NMR spectrum of methyl ( <i>E</i> )-2-[3-(4-methoxyphenyl)prop-2-yn-1-ylidene]betulonate ( <b>10</b> ) (75.47 MHz, $\text{CDCl}_3$ ). ..... | 15 |
| <b>Figure S24.</b> $^1\text{H}$ NMR spectrum of the 1,2,3-triazole–BoOMe compound <b>11</b> (300.13 MHz, $\text{CDCl}_3$ ). .....                                              | 16 |
| <b>Figure S25.</b> $^{13}\text{C}$ NMR spectrum of the 1,2,3-triazole–BoOMe compound <b>11</b> (75.47 MHz, $\text{CDCl}_3$ ). .....                                            | 16 |

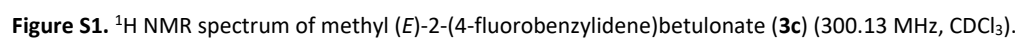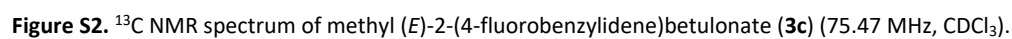

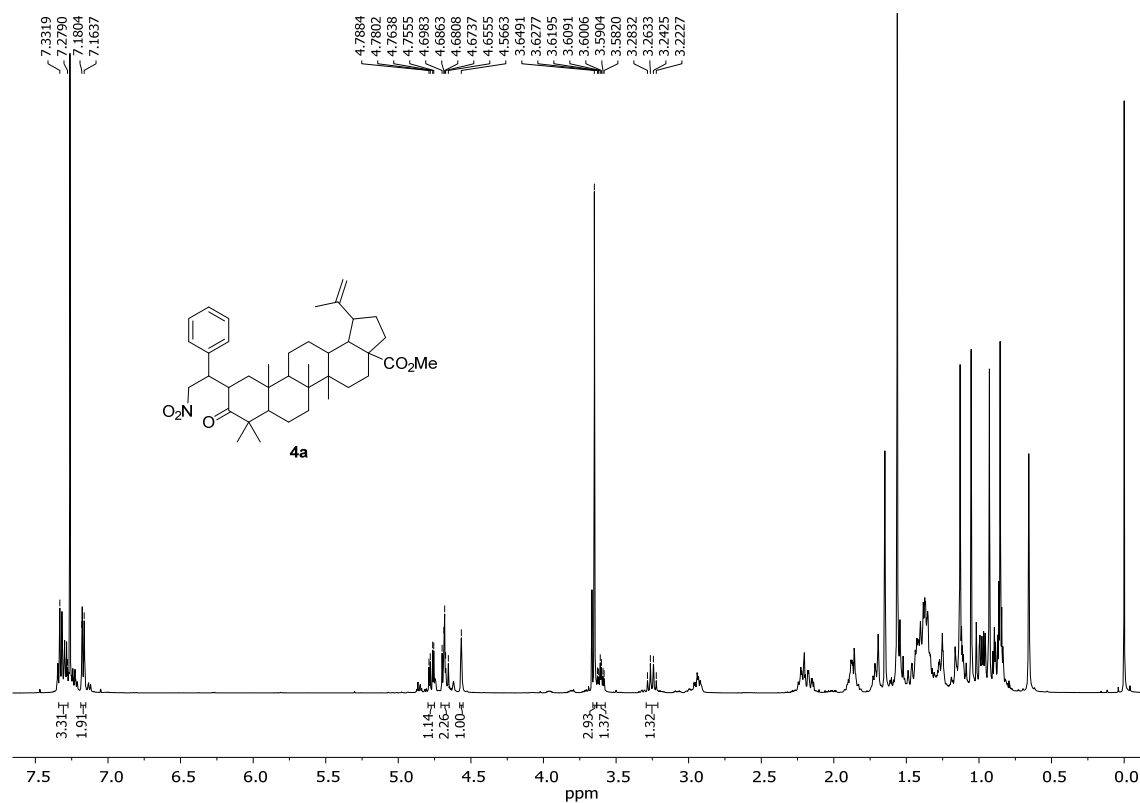

**Figure S3.** <sup>1</sup>H NMR spectrum of methyl 2-(1-phenyl-2-nitroethyl)betulonate (**4a**) (500.13 MHz, CDCl<sub>3</sub>).

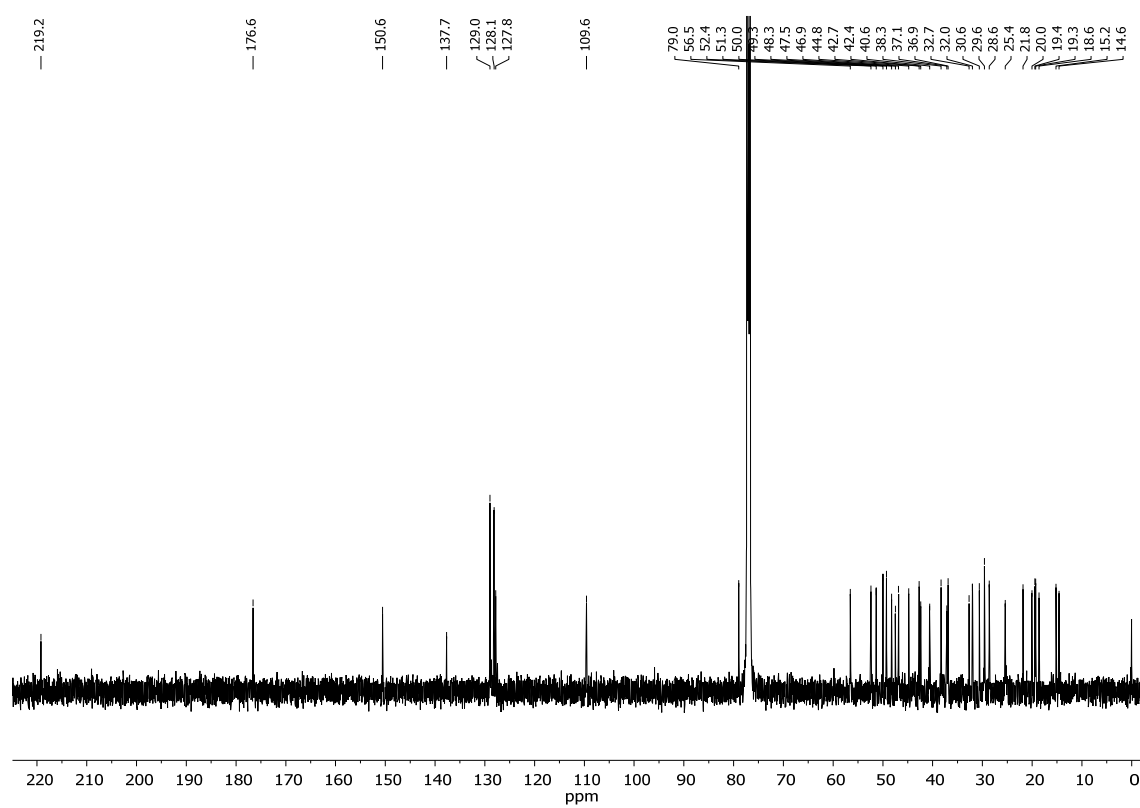

**Figure S4.** <sup>13</sup>C NMR spectrum of methyl 2-(1-phenyl-2-nitroethyl)betulonate (**4a**) (125.77 MHz, CDCl<sub>3</sub>).

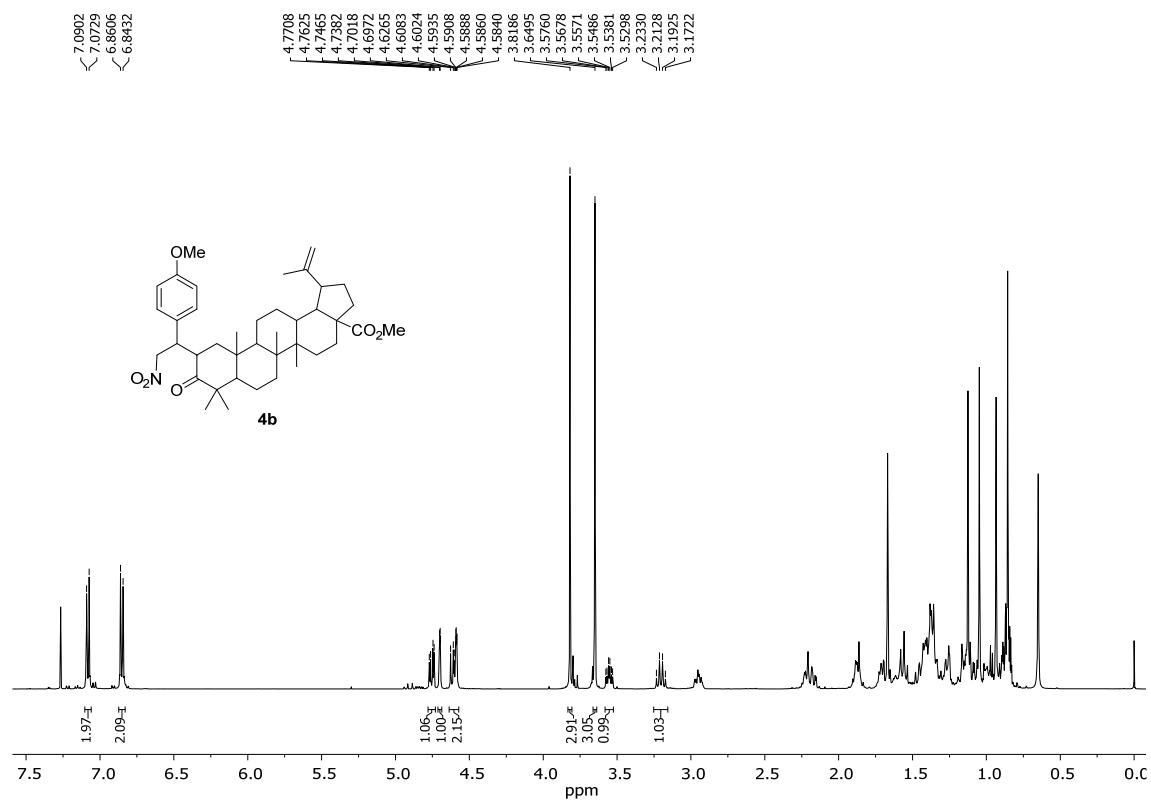

**Figure S5.** <sup>1</sup>H NMR spectrum of methyl 2-[1-(4-methoxyphenyl)-2-nitroethyl]betulonate (**4b**) (500.13 MHz, CDCl<sub>3</sub>).

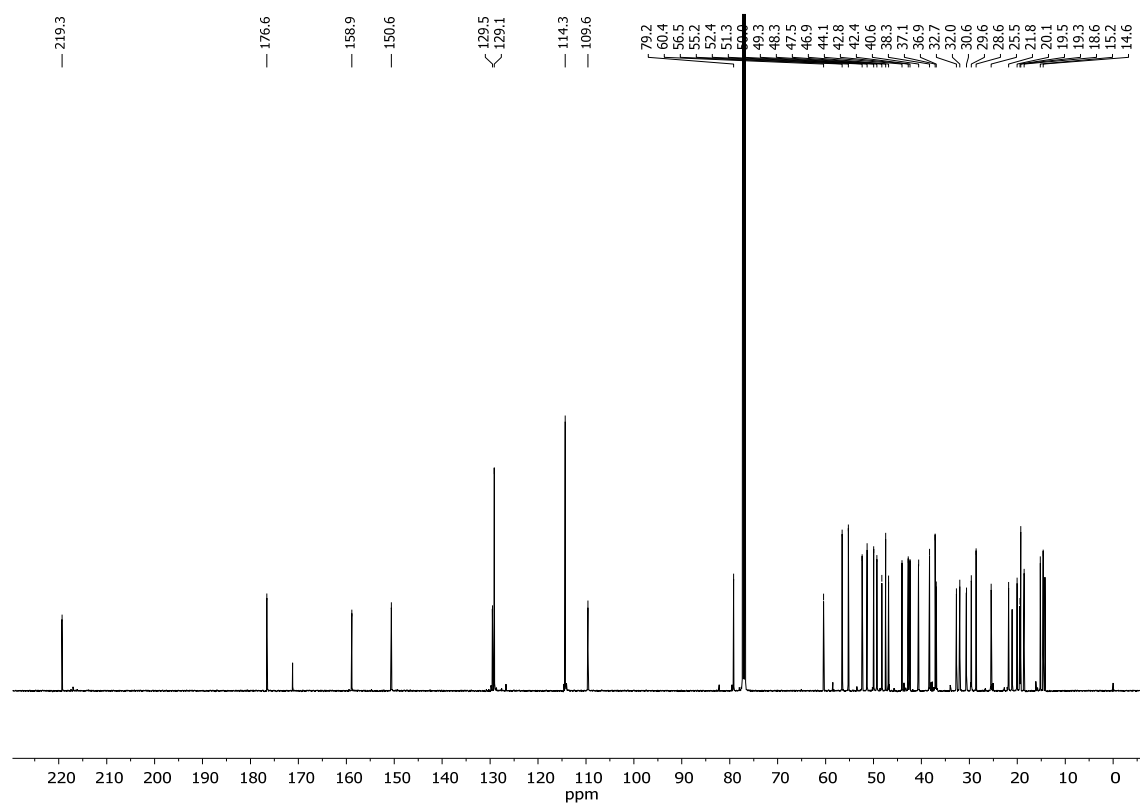

**Figure S6.** <sup>13</sup>C NMR spectrum of methyl 2-[1-(4-methoxyphenyl)-2-nitroethyl]betulonate (**4b**) (125.77 MHz, CDCl<sub>3</sub>).

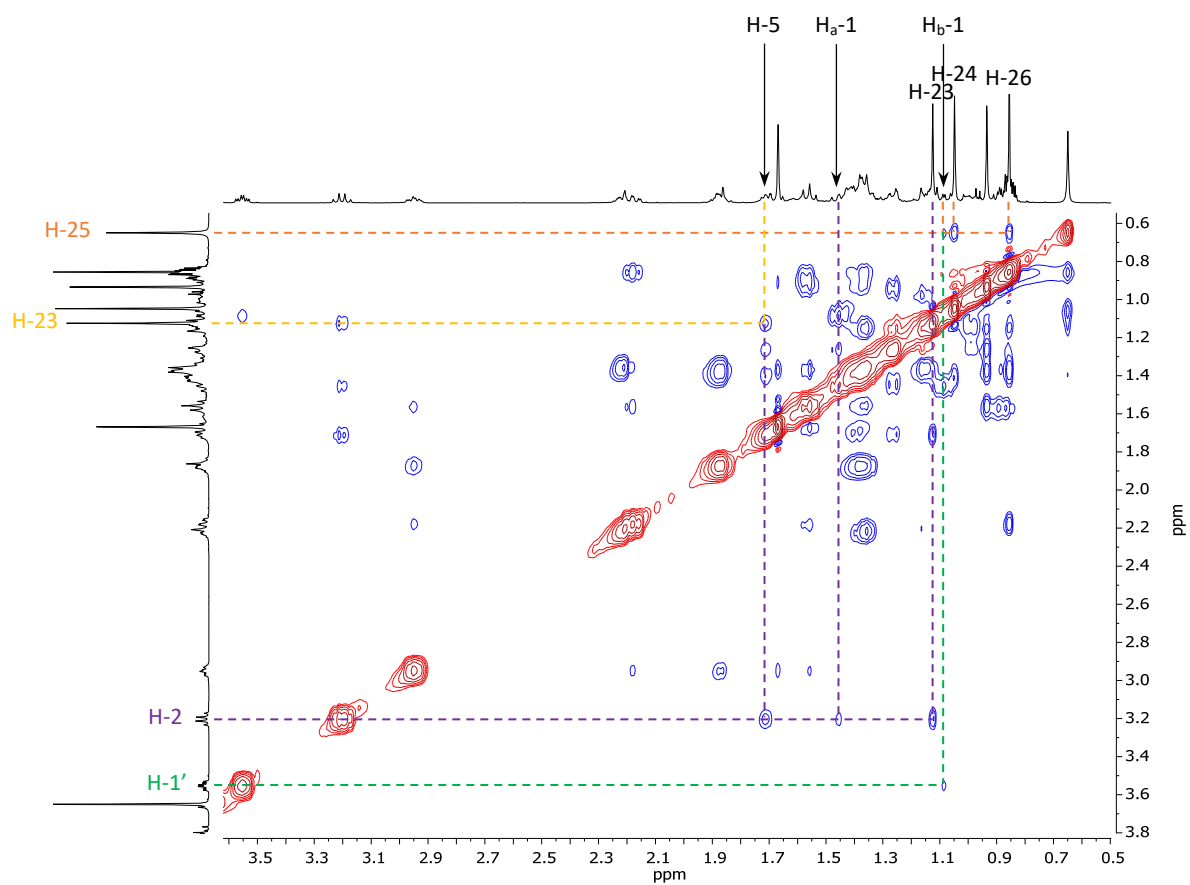

**Figure S7.** NOESY spectrum of the methyl 2-[1-(4-methoxyphenyl)-2-nitroethyl]betulonate (**4b**) (500.13 MHz, CDCl<sub>3</sub>).

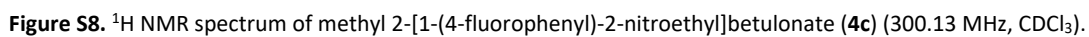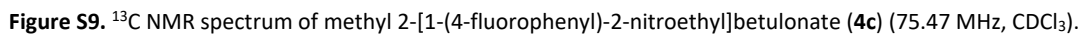

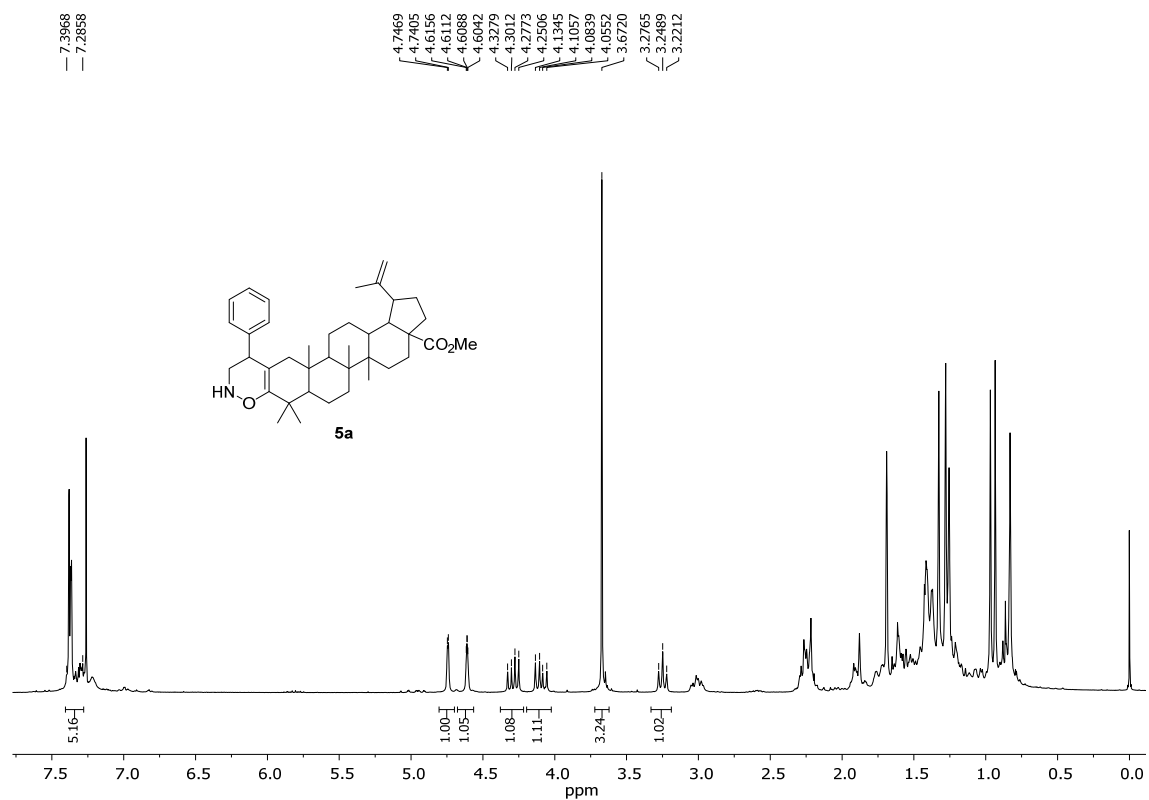

**Figure S10.** <sup>1</sup>H NMR spectrum of the 4-phenyl-1,2-oxazine-fused BoOMe compound **5a** (300.13 MHz, CDCl<sub>3</sub>).

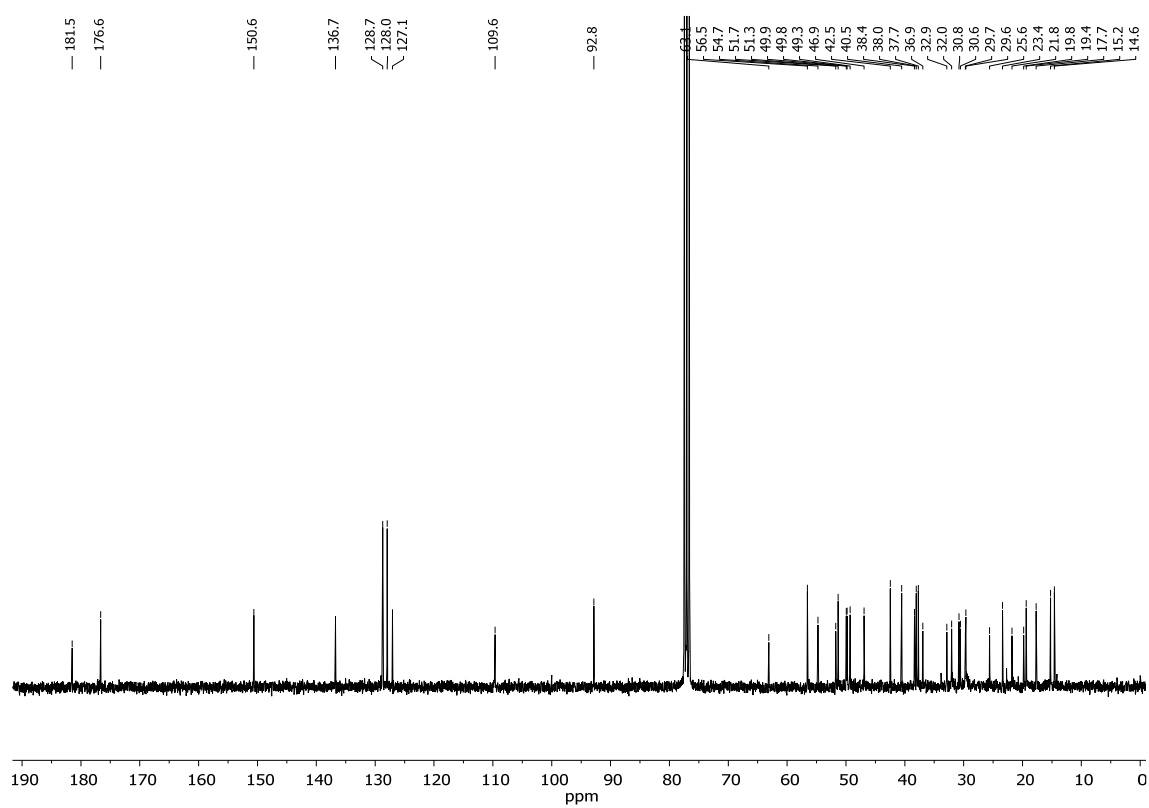

**Figure S11.** <sup>13</sup>C NMR spectrum of the 4-phenyl-1,2-oxazine-fused BoOMe compound **5a** (75.47 MHz, CDCl<sub>3</sub>).



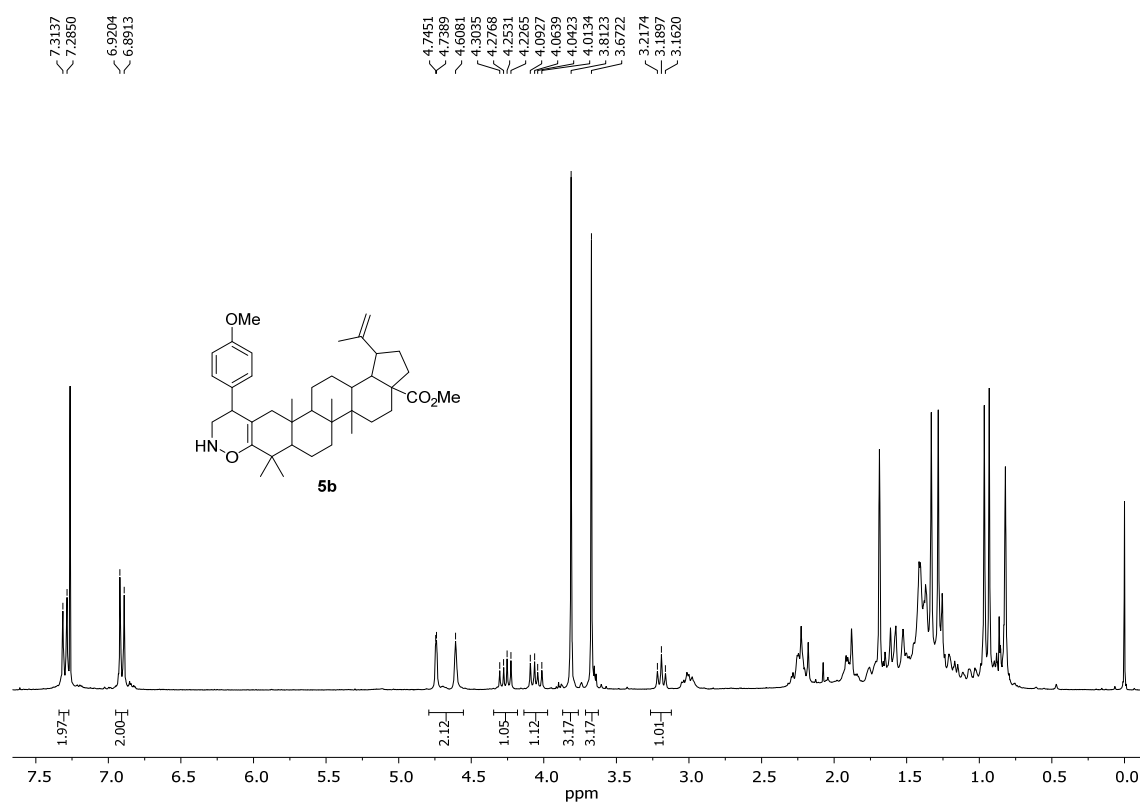

**Figure S12.** <sup>1</sup>H NMR spectrum of the 4-(4-methoxyphenyl)-1,2-oxazine-fused BoOMe compound **5b** (300.13 MHz, CDCl<sub>3</sub>).

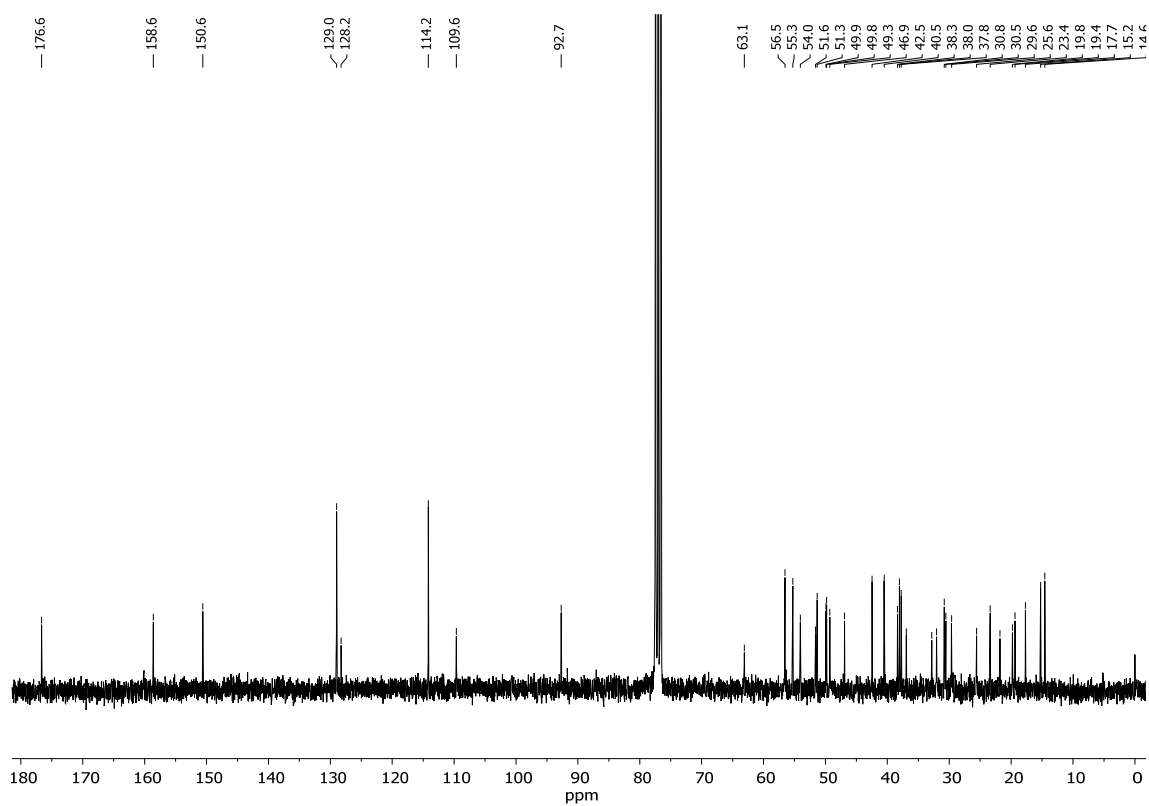

**Figure S13.** <sup>13</sup>C NMR spectrum of the 4-(4-methoxyphenyl)-1,2-oxazine-fused BoOMe compound **5b** (75.47 MHz, CDCl<sub>3</sub>).

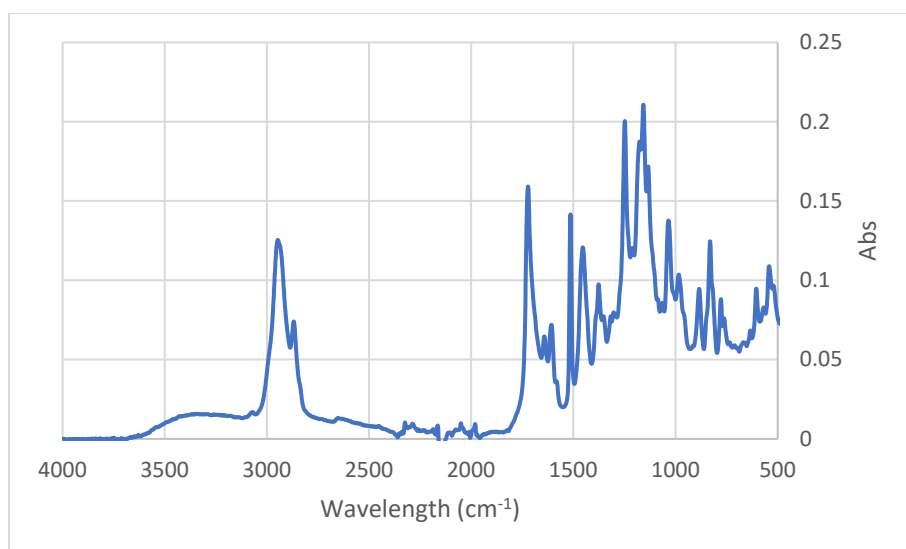

**Figure S14.** ATR-FTIR spectrum of the 4-(4-methoxyphenyl)-1,2-oxazine-fused BoOMe compound **5b** (FTIR Bruker Tensor 27, with ATR Golden Gate accessory, Diamond (Specac), Absorbance mode, resolution 4 cm<sup>-1</sup>, 256 scans, 4000-500 cm<sup>-1</sup>).

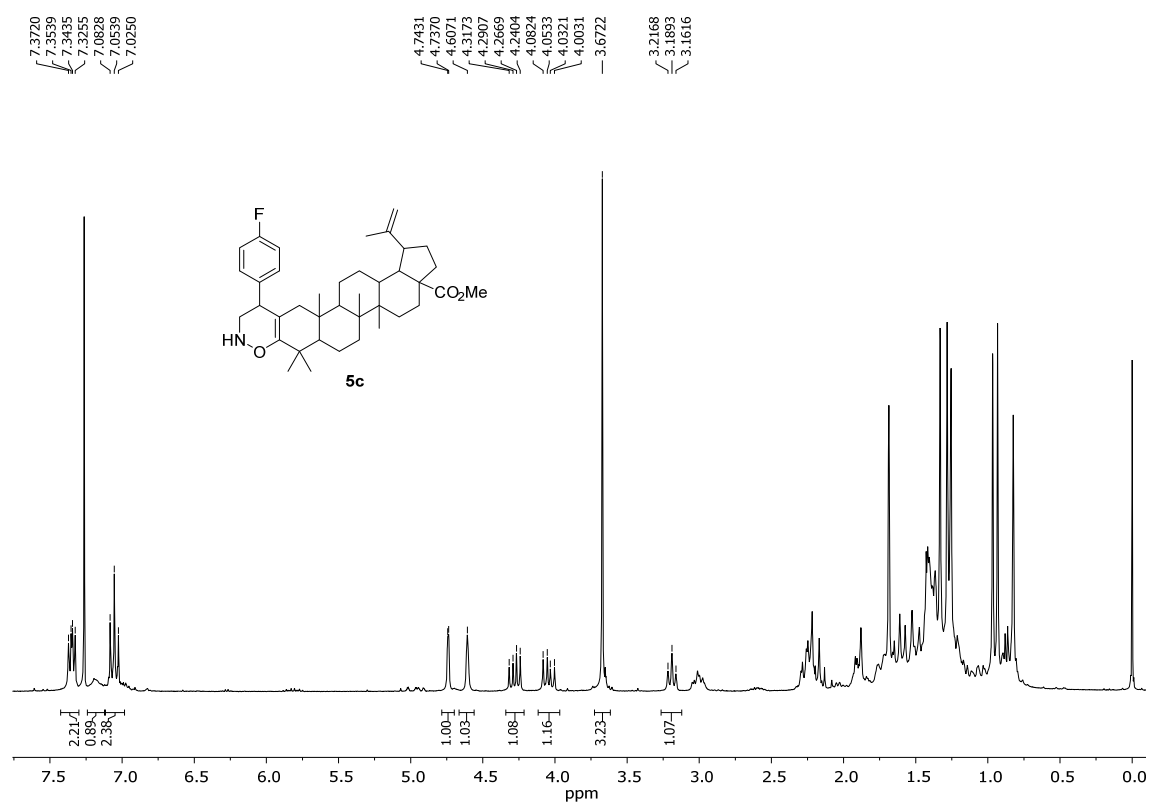

**Figure S15.** <sup>1</sup>H NMR spectrum of the 4-(4-fluorophenyl)-1,2-oxazine-fused BoOMe compound **5c** (300.13 MHz, CDCl<sub>3</sub>).

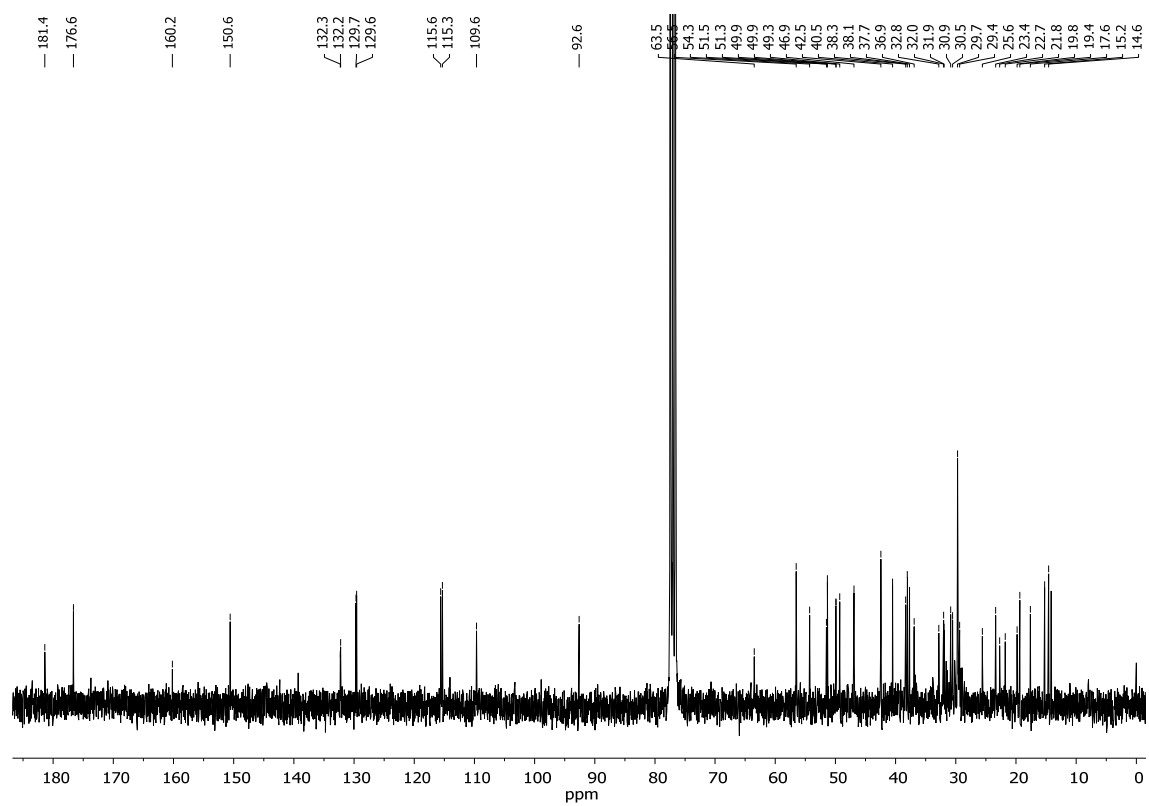

**Figure S16.** <sup>13</sup>C NMR spectrum of the 4-(4-fluorophenyl)-1,2-oxazine-fused BoOMe compound **5c** (75.47 MHz, CDCl<sub>3</sub>).

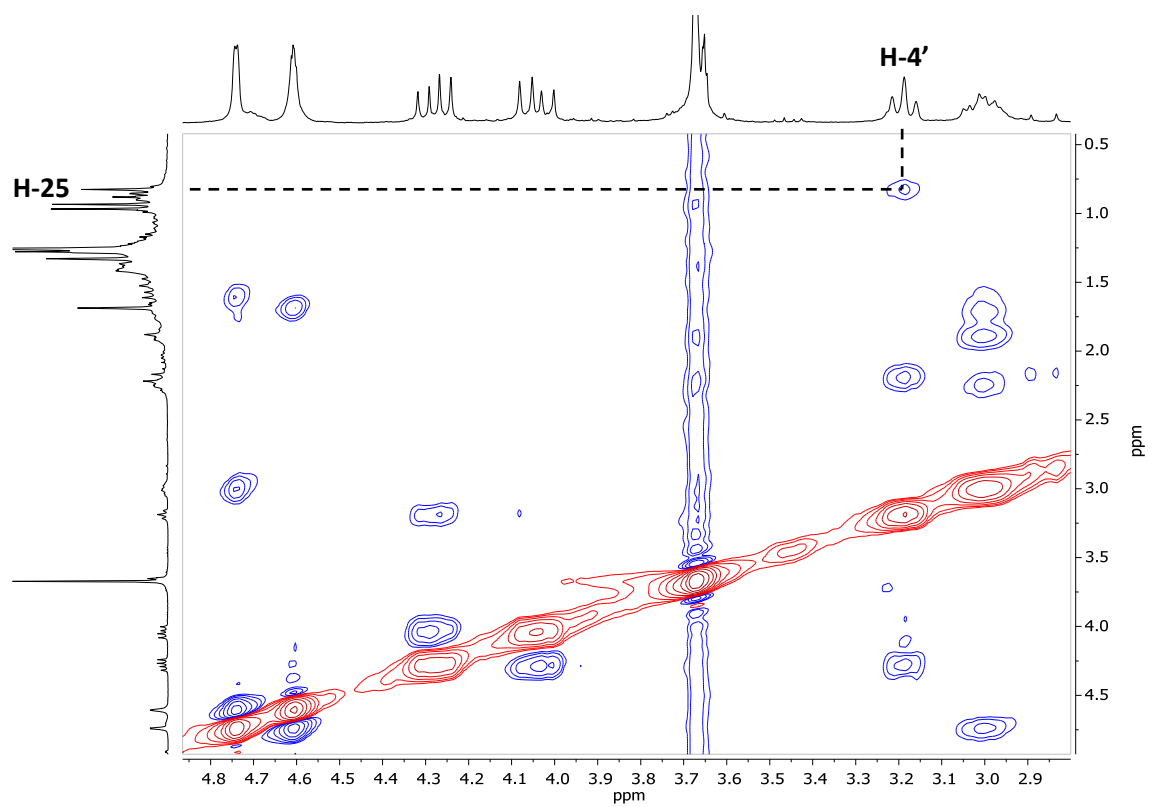

**Figure S17.** NOESY spectrum of the 4-(4-fluorophenyl)-1,2-oxazine-fused BoOMe compound **5c** (300.13 MHz, CDCl<sub>3</sub>).

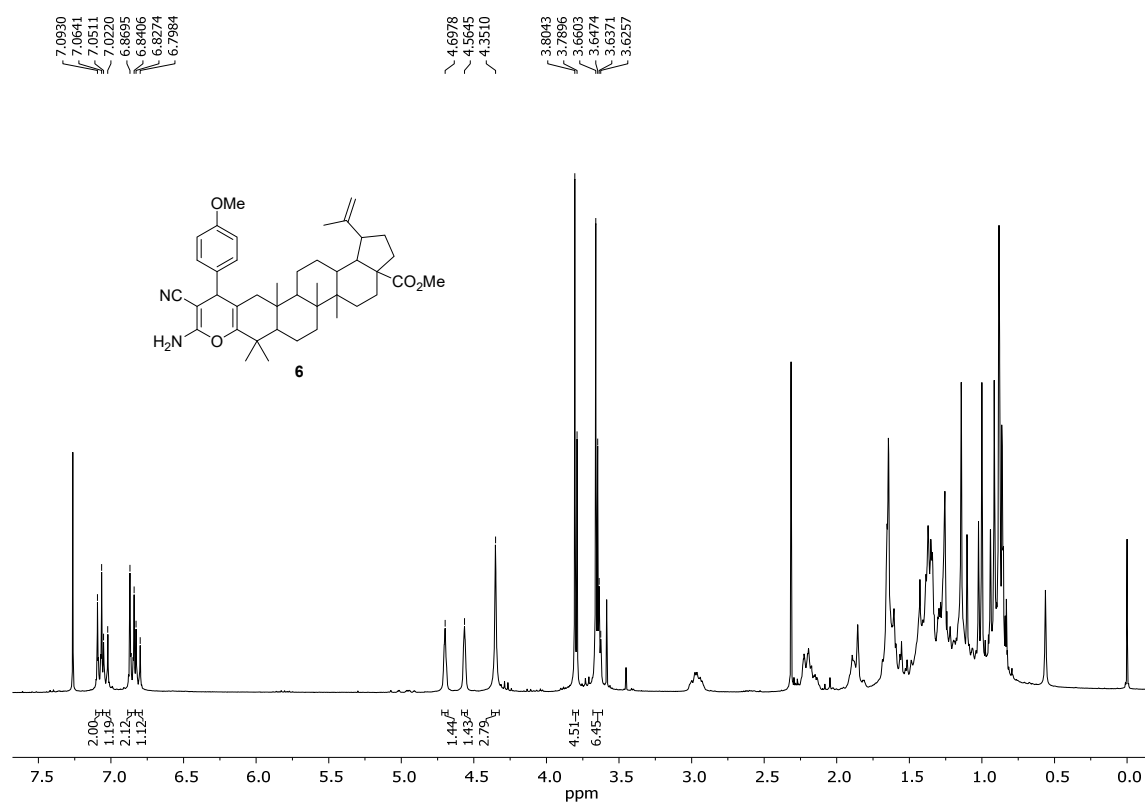

**Figure S18.** <sup>1</sup>H NMR spectrum of the pyran-fused BoOMe compound **6** (300.13 MHz, CDCl<sub>3</sub>).

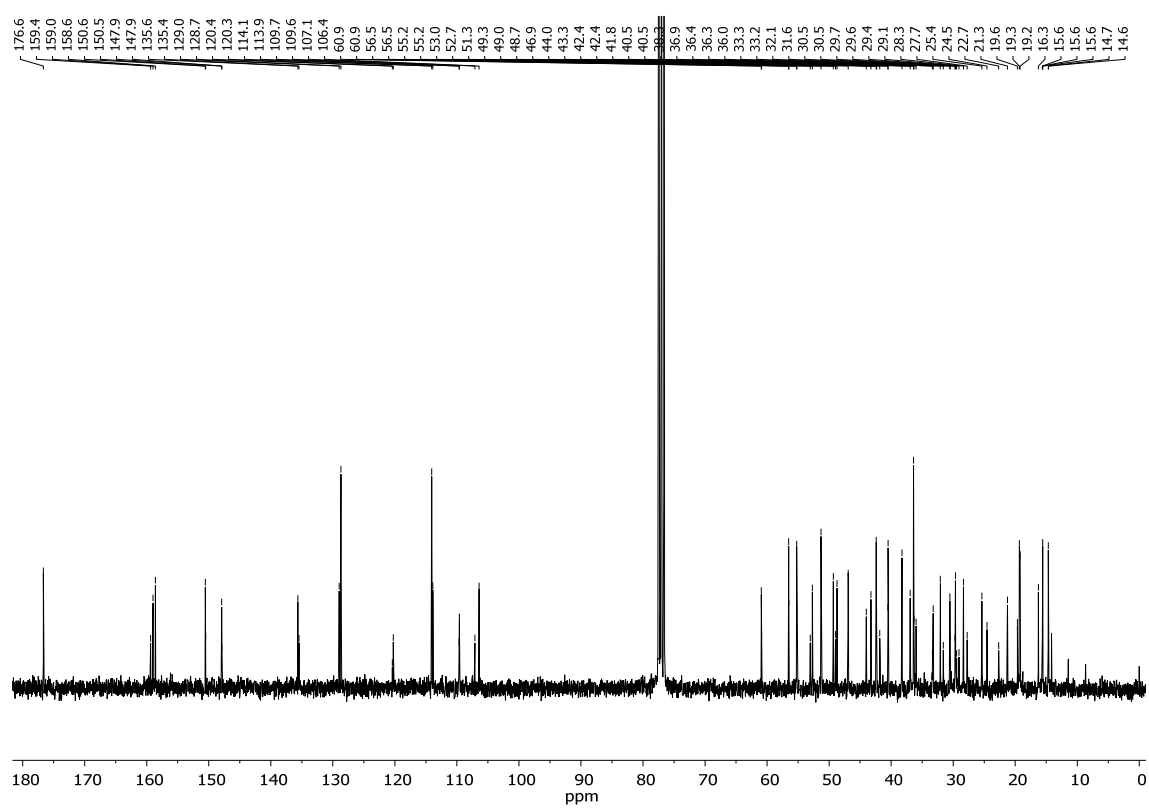

**Figure S19.** <sup>13</sup>C NMR spectrum of the pyran-fused BoOMe compound **6** (75.47 MHz, CDCl<sub>3</sub>).

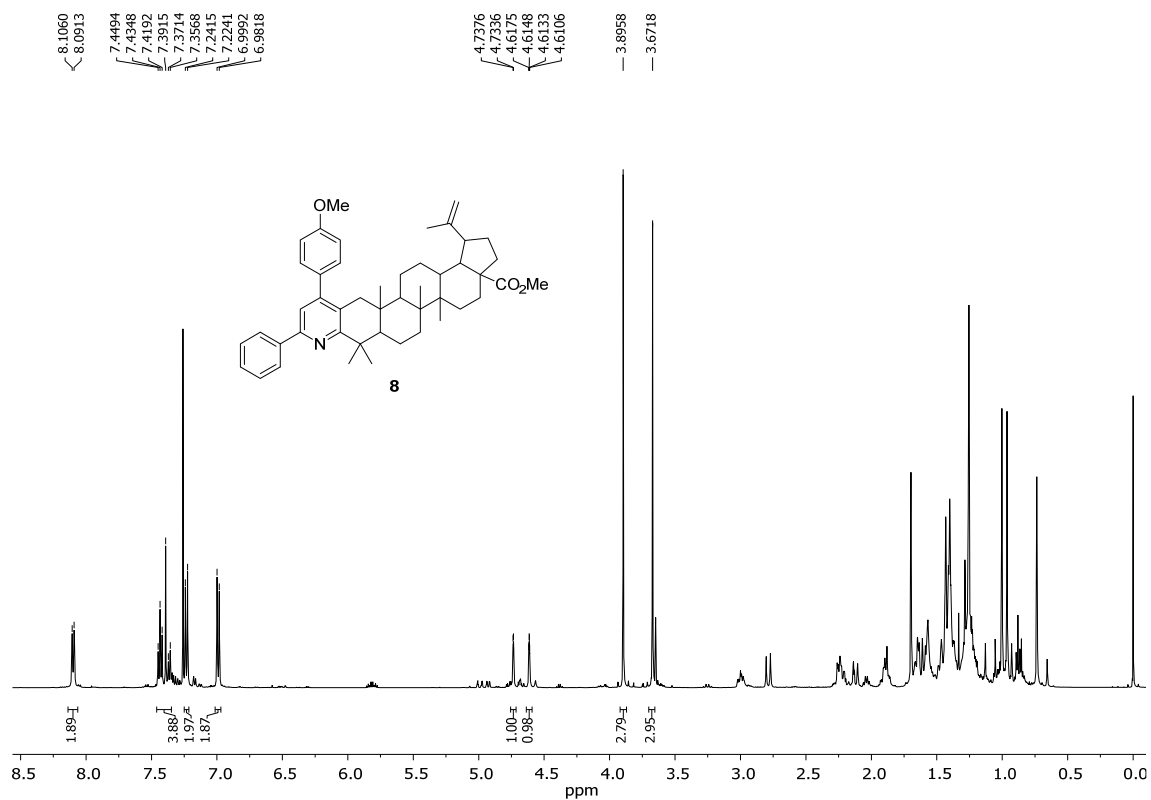

**Figure S20.** <sup>1</sup>H NMR spectrum of the diarylpyridine-fused BoOMe compound **8** (500.13 MHz, CDCl<sub>3</sub>).

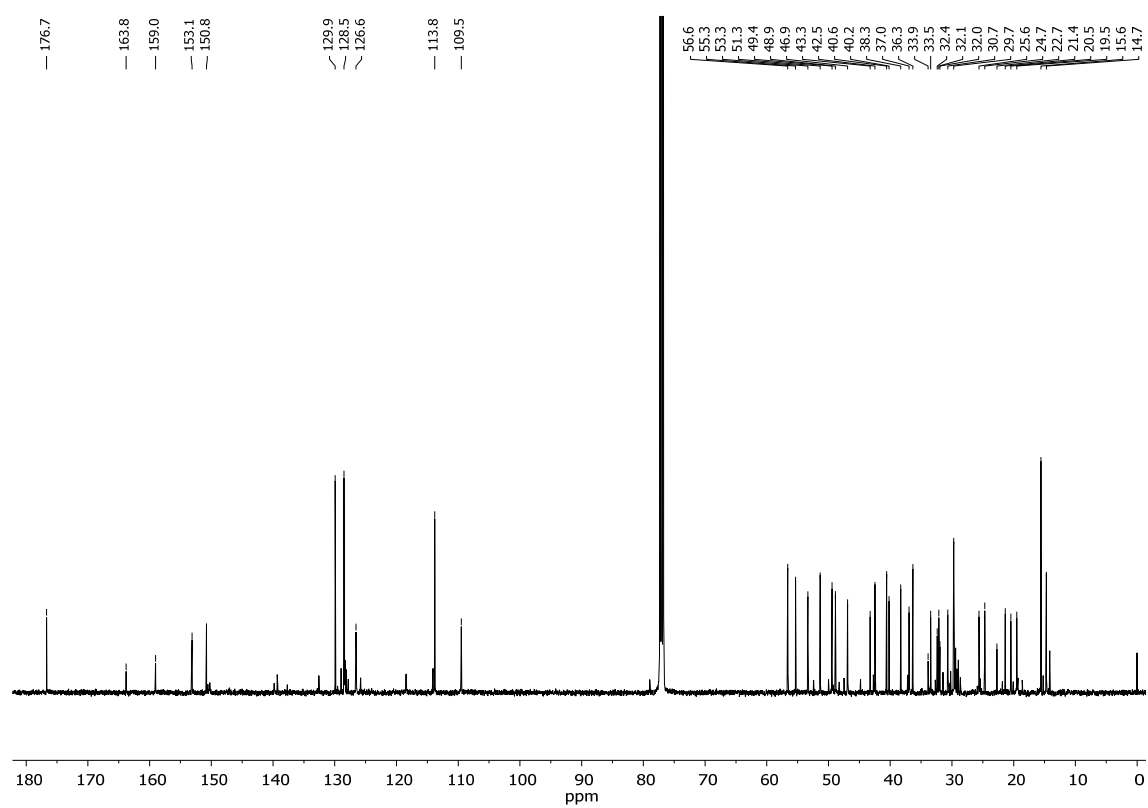

**Figure S21.** <sup>13</sup>C NMR spectrum of the diarylpyridine-fused BoOMe compound **8** (125.77 MHz, CDCl<sub>3</sub>).

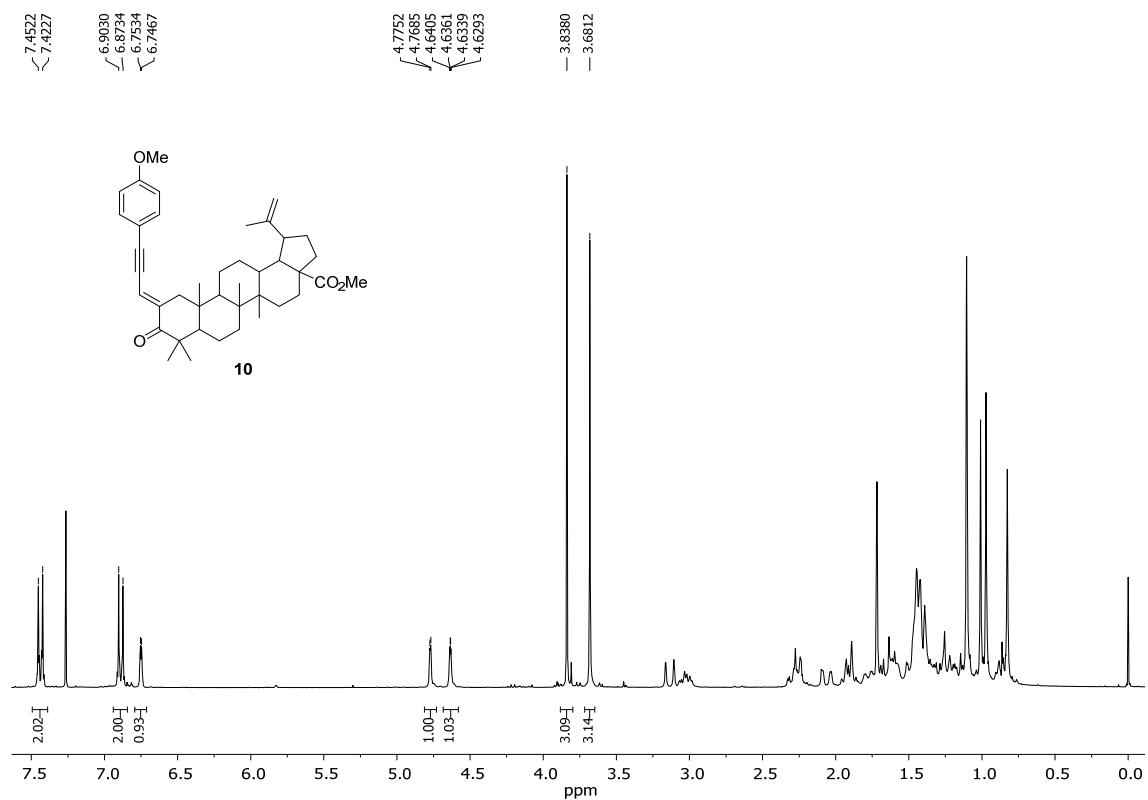

**Figure S22.** <sup>1</sup>H NMR spectrum of methyl (*E*)-2-[3-(4-methoxyphenyl)prop-2-yn-1-ylidene]betulonate (**10**) (300.13 MHz, CDCl<sub>3</sub>).

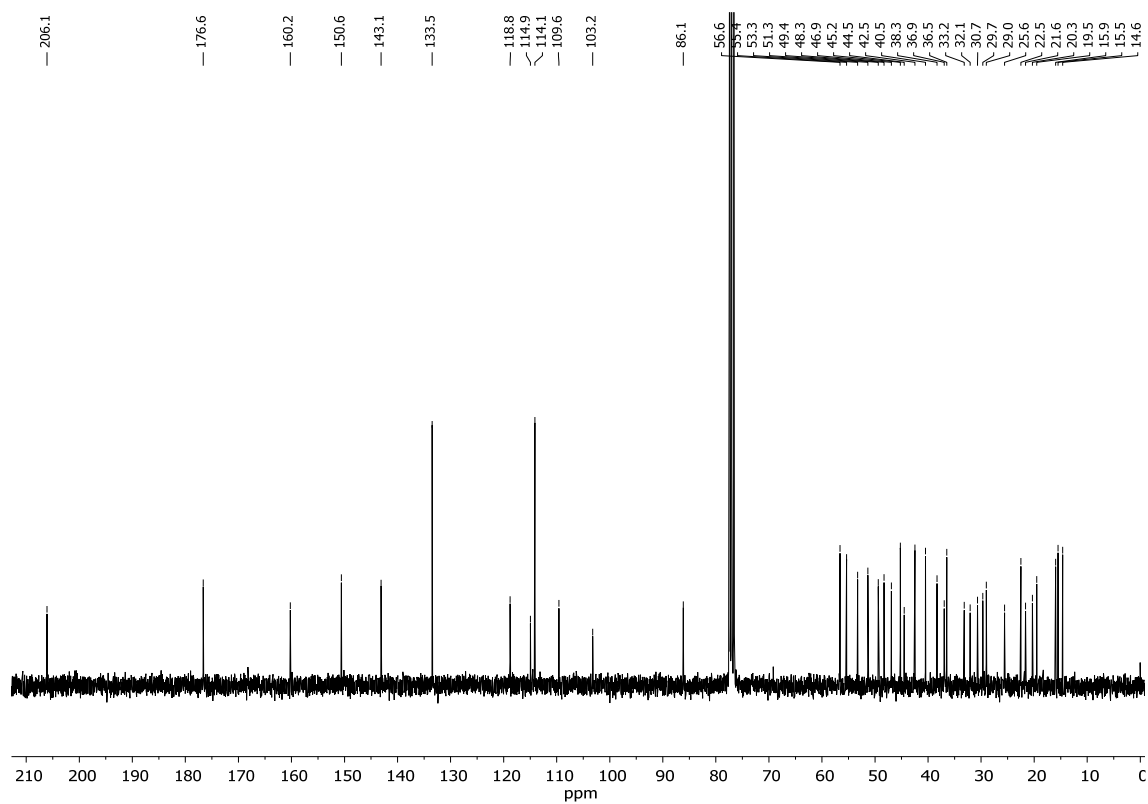

**Figure S23.** <sup>13</sup>C NMR spectrum of methyl (*E*)-2-[3-(4-methoxyphenyl)prop-2-yn-1-ylidene]betulonate (**10**) (75.47 MHz, CDCl<sub>3</sub>).

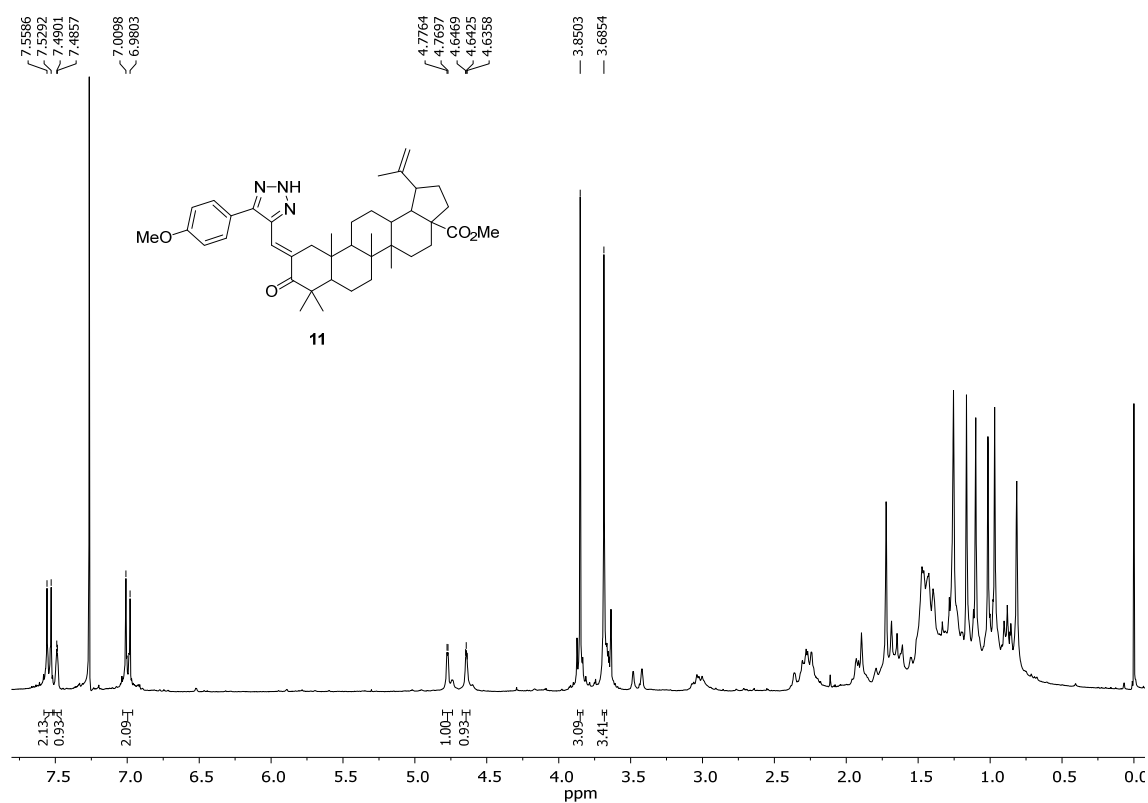

**Figure S24.**  $^1\text{H}$  NMR spectrum of the 1,2,3-triazole–BoOMe compound **11** (300.13 MHz,  $\text{CDCl}_3$ ).

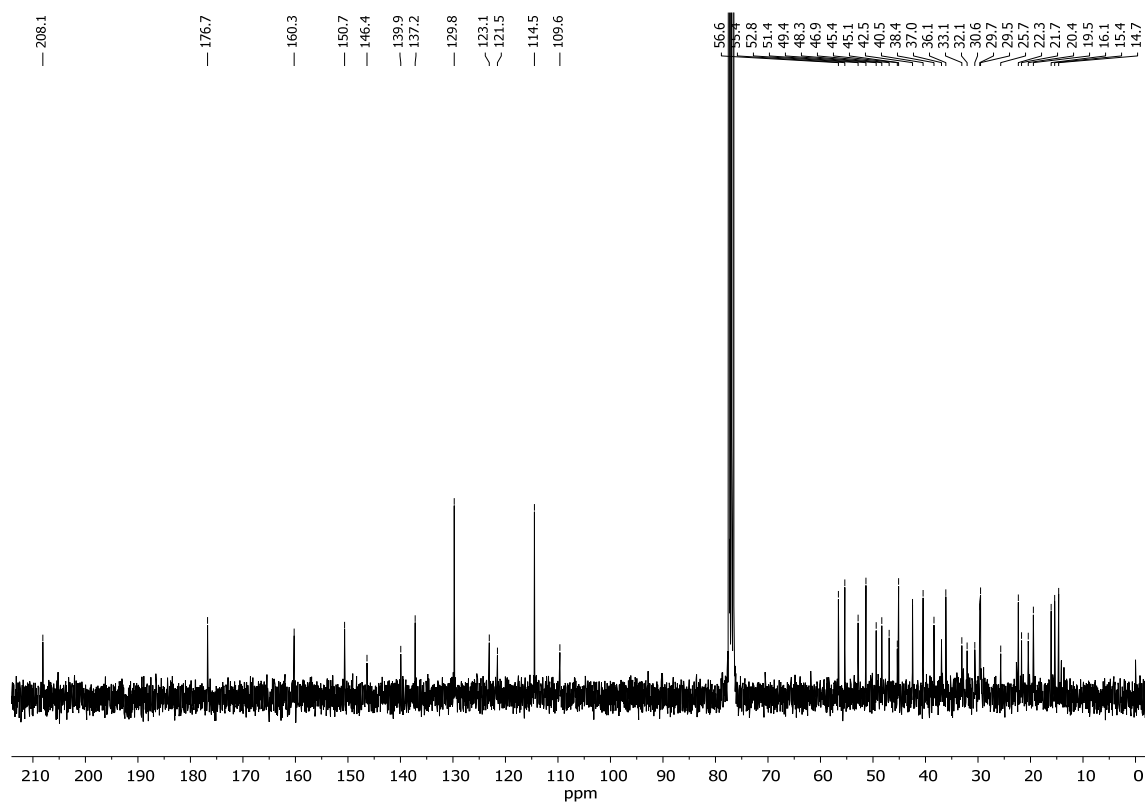

**Figure S25.**  $^{13}\text{C}$  NMR spectrum of the 1,2,3-triazole–BoOMe compound **11** (75.47 MHz,  $\text{CDCl}_3$ ).
